# Supplementary material for: CircMMP1 promotes colorectal cancer growth and metastasis by sponging miR-1238 and upregulating MMP family expression
Source: PubMed Central journal article supplement — Ann Transl Med. 2021 Aug;9(16):1341. doi: 10.21037/atm-21-3930 (PMC8422139; doi:10.21037/atm-21-3930), 2021-08
Supplement: atm-09-16-1341-dss.pdf [file atm-09-16-1341-dss.pdf]

## Data Sharing Statement

|                     |                                                                                                                                                     |                                                                                                                                                                             |
|---------------------|-----------------------------------------------------------------------------------------------------------------------------------------------------|-----------------------------------------------------------------------------------------------------------------------------------------------------------------------------|
| <b>Article Info</b> | <a href="https://dx.doi.org/10.21037/atm-21-3930">https://dx.doi.org/10.21037/atm-21-3930</a>                                                       |                                                                                                                                                                             |
| <b>Item</b>         | <b>Question</b>                                                                                                                                     | <b>Authors' Response<br/>(place “-” if not applicable)</b>                                                                                                                  |
| 1                   | Would you like to share data collected for your study to others?                                                                                    | Yes.                                                                                                                                                                        |
| 2                   | If not, would you like to share the reason for your decision?                                                                                       | -                                                                                                                                                                           |
| 3                   | What data in particular will be shared?                                                                                                             | The survival data from CRC patients will be shared, and we found a correlation between circMMP1 and OS in CRC patients, which has seldom been provided in previous studies. |
| 4                   | Any other documents will be shared? Such as study protocol, statistical analysis plan, informed consent form, clinical study report, analytic code. | Yes, research plan and statistical analysis plan are included.                                                                                                              |
| 5                   | When will data availability begin?                                                                                                                  | From the publication date.                                                                                                                                                  |
| 6                   | When will data availability end?                                                                                                                    | Five years within the publication date, since the technique or survival date may be updated over time.                                                                      |
| 7                   | To whom will you share the data?                                                                                                                    | Medical oncologists and CRC surgeons who are interested in studies of circMMP1.                                                                                             |
| 8                   | For what type of analysis or purpose?                                                                                                               | Scientific research.                                                                                                                                                        |
| 9                   | How or where can the data/documents be obtained?                                                                                                    | Please contact the corresponding author.<br>caishirong@vip.126.com<br>fanwh@sysucc.org.cn                                                                                   |
| 10                  | Any other restrictions?                                                                                                                             | We may balance the potential benefits and risks for each request and then provide the data that could be shared.                                                            |
